# Supplementary material for: Electrochemical measurements and theoretical studies for understanding the behavior of catechol, resorcinol and hydroquinone on the boron doped diamond surface
Source: PubMed Central journal article supplement — RSC Adv. 2018 Jan 16;8(7):3483–92. doi: 10.1039/c7ra12257h (PMC9077693; doi:10.1039/c7ra12257h), 2018-01-16
Supplement: RA-008-C7RA12257H-s001.pdf [file RA-008-C7RA12257H-s001.pdf]

**Electrochemical measurements and theoretical studies for understanding the behavior of  
Catechol, Resorcinol and Hydroquinone on the boron doped diamond surface**

Amison Rick Lopes da Silva, Alessandro Jhones dos Santos, Carlos A. Martínez-Huitle\*

*Laboratório de Eletroquímica Ambiental e Aplicada (LEAA), Institute of Chemistry, Federal  
University of Rio Grande do Norte, Lagoa Nova, CEP 59078-970, Natal, RN, Brazil.*

Corresponding author: [carlosmh@quimica.ufrn.br](mailto:carlosmh@quimica.ufrn.br)

Supplementary material: dates in DFT 6-311 ++ G (d, p)

**FIGURE 8: INTERMEDIATE ENERGIES**

**vacuum**

| Name | Gibbs/hartree | Relative | Relative/eV |
|------|---------------|----------|-------------|
| CT1  | -382.729575   | 0        | 0           |
| CT2  | -382.193415   | 0.53616  | 14.58944976 |
| CT3  | -381.462378   | 1.267197 | 34.48169757 |
| CT4  | -381.579729   | 1.149846 | 31.28845951 |
| CT5  | -381.448978   | 1.280597 | 34.84632497 |
| CT6  | -381.496338   | 1.233237 | 33.55761201 |

  

|     |             |          |             |
|-----|-------------|----------|-------------|
| HQ1 | -382.726222 | 0        | 0           |
| HQ2 | -382.17265  | 0.553572 | 15.06324769 |
| HQ3 | -381.473079 | 1.253143 | 34.09927417 |
| HQ4 | -381.589889 | 1.136333 | 30.92075726 |
| HQ5 | -381.432294 | 1.293928 | 35.20907481 |
| HQ6 | -381.50809  | 1.218132 | 33.14658985 |

  

|     |            |          |             |
|-----|------------|----------|-------------|
| RS1 | -382.72921 | 0        | 0           |
| RS2 | -382.18222 | 0.54699  | 14.88414489 |
| RS3 | -381.48468 | 1.244531 | 33.86493304 |
| RS4 | -381.56870 | 1.160514 | 31.57874645 |
| RS5 | -381.46427 | 1.264936 | 34.4201735  |
| RS6 | -382.71126 | 0.017949 | 0.488410239 |

---

**Implicit solvent**

| Name | Gibbs/hartree | Relative | Relative/eV |
|------|---------------|----------|-------------|
| CT1  | -382.738067   | 0        | 0           |
| CT2  | -382.279433   | 0.458634 | 12.47988977 |
| CT3  | -381.78495    | 0.953117 | 25.93526669 |
| CT4  | -381.67081    | 1.067257 | 29.04113023 |
| CT5  | -381.465336   | 1.272731 | 34.63228324 |
| CT6  | -381.509381   | 1.228686 | 33.43377475 |

|     |             |          |             |
|-----|-------------|----------|-------------|
| HQ1 | -382.737128 | 0        | 0           |
| HQ2 | -382.267918 | 0.46921  | 12.76767331 |
| HQ3 | -381.78193  | 0.955198 | 25.99189278 |
| HQ4 | -381.674254 | 1.062874 | 28.92186441 |
| HQ5 | -381.424537 | 1.312591 | 35.7169137  |
| HQ6 | -382        | 1.219312 | 33.17869883 |

|     |             |          |             |
|-----|-------------|----------|-------------|
| RS1 | -382.73965  | 0        | 0           |
| RS2 | -382.274727 | 0.464923 | 12.65101975 |
| RS3 | -381.793829 | 0.945821 | 25.73673523 |
| RS4 | -381.657809 | 1.081841 | 29.43797545 |
| RS5 | -381.475099 | 1.264551 | 34.40969726 |
| RS6 | -382.724475 | 0.015175 | 0.412926925 |

## Ionization Potential and Electronic Affinity of Table 1

Following the reference: C.G. Zhan, J. A. Nichols, and D. A. Dixon; *J. Phys. Chem. A* 2003, 107, 4184-4195

The indications for the calculation of Ionization Potential and Electronic Affinity: IP:  $E(M^+) - E(M)$  and EA:  $E(M) - E(M^-)$

| Name      | Vacuum      |             | Implicit solvent |             |
|-----------|-------------|-------------|------------------|-------------|
|           | Energy (au) | Energy (eV) | Energy (au)      | Energy (eV) |
| CT1 (M)   | -382,729575 | -10414,454  | -382,73807       | -10414,686  |
| CT1+ (M+) | -382,436772 | -10406,487  | -382,51904       | -10408,726  |

| Vacuum        | solvent    |
|---------------|------------|
| IP = E(+) - E |            |
| 7,967462433   | 5,95986206 |

|           |             |            |            |            |
|-----------|-------------|------------|------------|------------|
| CT6 (M)   | -381,496338 | -10380,897 | -381,50938 | -10381,252 |
| CT6- (M-) | -381,579729 | -10383,166 | -381,67081 | -10385,644 |

| Vacuum        | solvent    |
|---------------|------------|
| EA = E - E(-) |            |
| 2,269152501   | 4,39264452 |

|           |             |            |            |            |
|-----------|-------------|------------|------------|------------|
| HQ1 (M)   | -382,726222 | -10414,363 | -382,73715 | -10414,661 |
| HQ1+ (M+) | -382,44169  | -10406,621 | -382,52619 | -10408,92  |

| Vacuum        | solvent    |
|---------------|------------|
| IP = E(+) - E |            |
| 7,742400252   | 5,74035093 |

|           |             |            |            |            |
|-----------|-------------|------------|------------|------------|
| HQ6 (M)   | -381,50809  | -10381,217 | -381,51782 | -10381,481 |
| HQ6- (M-) | -381,589889 | -10383,442 | -381,67426 | -10385,738 |

| Vacuum        | solvent    |
|---------------|------------|
| EA = E - E(-) |            |
| 2,225832589   | 4,25680721 |

|           |            |            |            |            |
|-----------|------------|------------|------------|------------|
| RS1       | -382,72921 | -10414,445 | -382,73966 | -10414,729 |
| RS1+ (M+) | -382,43280 | -10406,379 | -382,51674 | -10408,663 |

| Vacuum        | solvent    |
|---------------|------------|
| IP = E(+) - E |            |
| 8,065639721   | 6,06590333 |

|           |            |            |            |            |
|-----------|------------|------------|------------|------------|
| RS6 (M)   | -382,71126 | -10413,956 | -382,72448 | -10414,316 |
| RS6- (M-) | -382,73467 | -10414,593 | -382,82153 | -10416,957 |

| Vacuum        | solvent    |
|---------------|------------|
| EA = E - E(-) |            |
| 0,63700951    | 2,64069149 |
